# Supplementary material for: Polyamino-Isoprenic Derivatives Block Intrinsic Resistance of P. aeruginosa to Doxycycline and Chloramphenicol In Vitro
Source: PubMed Central journal article supplement (PMC4859512; doi:10.1371/journal.pone.0154490), 2016-05-06

## Chemical parameters

a) Estimation of protonated species encountered at various pH for compound **3**.

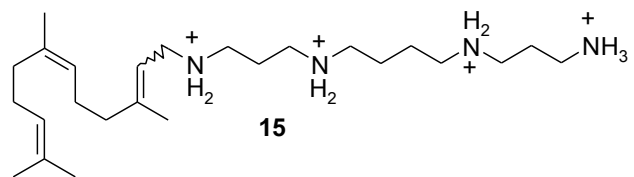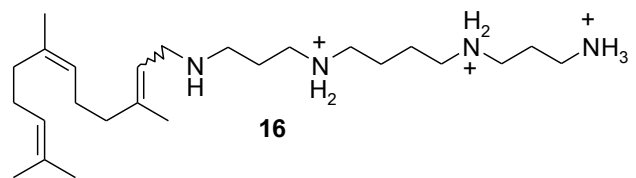

At pH 7.0 species **16** in 90.7% and species **15** in 4.99%

At pH 7.2 species **16** at 85.89% and species **15** in 7.49%

b) Identification of the major species according to pH theoretical values.

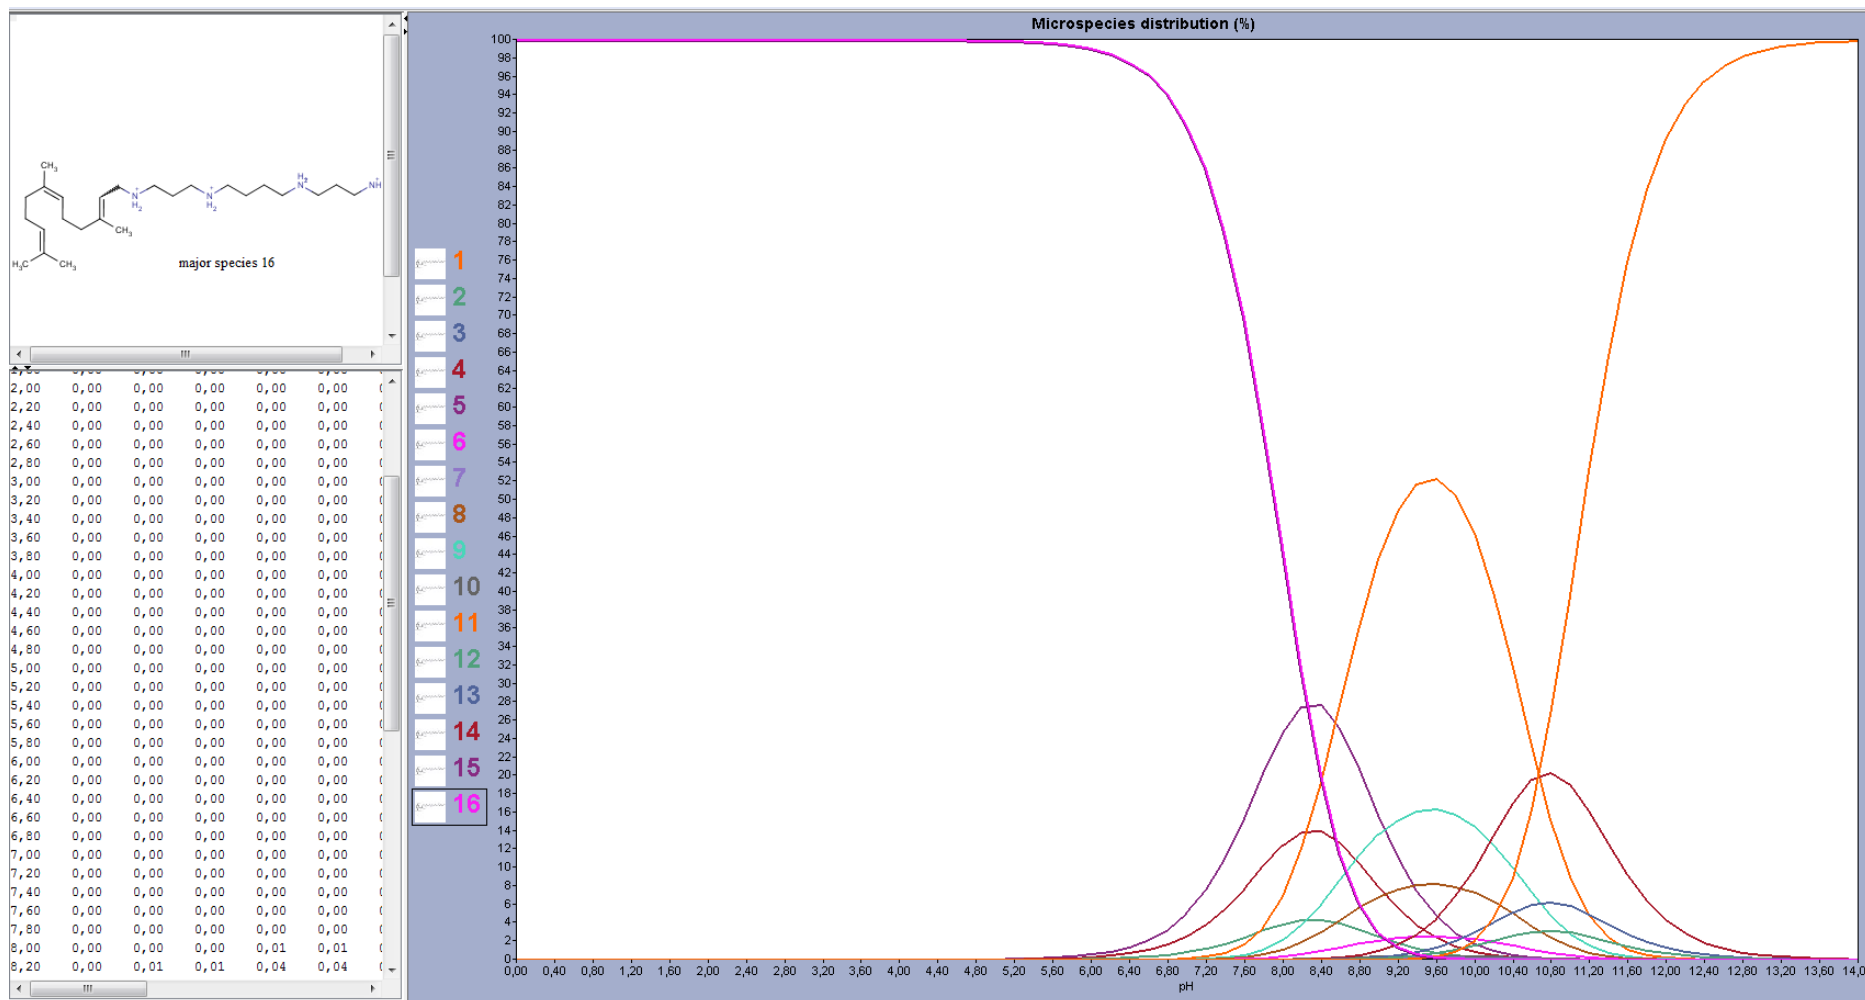

Supplement: pone.0154490.s002.pdf [file pone.0154490.s002.pdf]
