# Supplementary material for: Polyamino-Isoprenic Derivatives Block Intrinsic Resistance of P. aeruginosa to Doxycycline and Chloramphenicol In Vitro
Source: PubMed Central journal article supplement (PMC4859512; doi:10.1371/journal.pone.0154490), 2016-05-06
Supplement: pone.0154490.s003.pdf [file pone.0154490.s003.pdf]

## Inner membrane depolarization assay

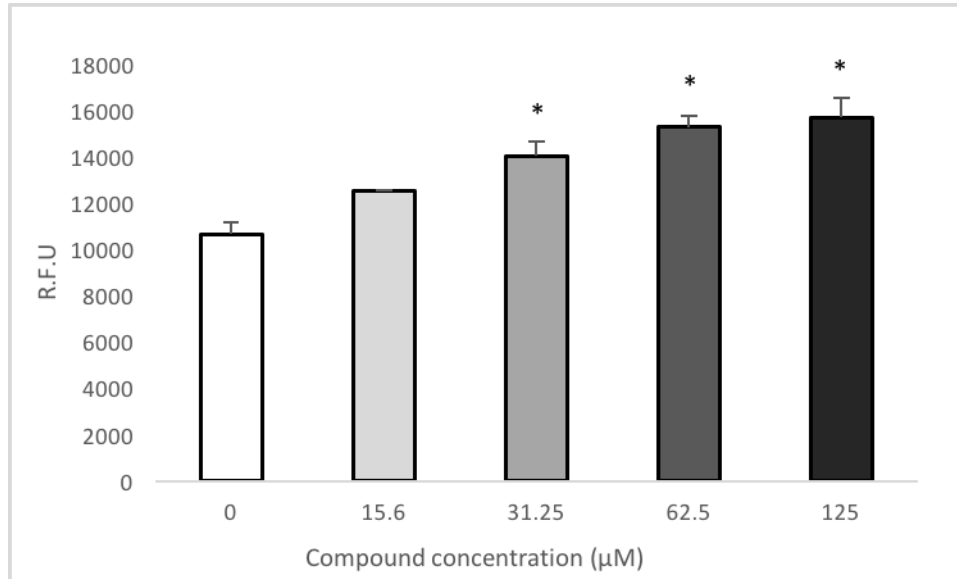

An overnight culture of PA01 was diluted 100 fold in MHII broth. Cells were grown to a mid-logarithmic phase, recovered by centrifugation (3000 X g for 20 min) and washed in 5 mM 4-(2-hydroxyethyl)piperazine-1-ethanesulfonic acid (HEPES, pH 7.0) containing 10 mM EDTA. After 5 min incubation at room temperature, cells were recovered by centrifugation (3000 X g for 20 min), and resuspended in 5 mM HEPES (pH 7.0) containing 50 mM glucose, OD600 nm was adjusted to 0.29. Five  $\mu\text{l}$  of a 160  $\mu\text{M}$  suspension of [3,3'-Dipropylthiadicarbocyanine iodide] (Disc<sub>3</sub>(5)) were added after 90 sec to 100  $\mu\text{l}$  of a bacterial suspension, in a 96-well Greiner black microplate, to reach 8  $\mu\text{M}$  final concentration. After a 16.5 min incubation period allowing incorporation of the dye into the polarized membrane, 10  $\mu\text{l}$  of the appropriate compound concentration were added. Fluorescence was monitored every 30 sec on an Infinite M200 microplate reader (Tecan; excitation wavelength 622nm and emission wavelength 690nm). Assays were performed in two independent experiments and statistically significance was assessed using a student's t-test. A p-value  $\leq 0.05$  was considered significant.
