# Supplementary material for: Polyamino-Isoprenic Derivatives Block Intrinsic Resistance of P. aeruginosa to Doxycycline and Chloramphenicol In Vitro
Source: PubMed Central journal article supplement (PMC4859512; doi:10.1371/journal.pone.0154490), 2016-05-06
Supplement: pone.0154490.s004.pdf [file pone.0154490.s004.pdf]

| Isolates     | Sampling location | Sampling date | Patient age | Doxycycline MIC (mg/L) | Main antibiotic resistance                                                                   |
|--------------|-------------------|---------------|-------------|------------------------|----------------------------------------------------------------------------------------------|
| PA2013-LAV01 | Superficial pus   | 13/11/2012    | 80          | 32                     | TIC, TCC, FOS, TET, MIN, TGC, CHL, CAR                                                       |
| PA2013-LAV02 | Urine             | 12/11/2012    | 95          | 32                     | TIC, TCC, FOS, TET, MIN, TGC, CHL,                                                           |
| PA2013-LAV03 | Urine             | 13/11/2012    | 20          | >32                    | PIP, PIP/TZP, GEN, CAZ, TIC, TCC, TOB, IPM, CIP, AMK, LVX, OFX, TET, MIN, TGC, CHL, NET, CAR |
| PA2013-LAV04 | Urine             | 14/11/2012    | 81          | 32                     | TIC, TCC, FOS, TET, MIN, TGC, CHL,                                                           |
| PA2013-LAV05 | Lung              | 28/11/2012    | 81          | >32                    | GEN, TIC, TCC, TOB, CIP, AMK, LVX, OFX, TET, MIN, TGC, CHL, NET, CAR                         |
| PA2013-LAV06 | Lung              | 29/11/2012    | 70          | 32                     | FOS, OFX, TET, MIN, TGC, CHL, NET,                                                           |
| PA2013-LAV07 | Superficial pus   | 01/12/2012    | 88          | 32                     | TIC, TCC, FOS, TET, MIN, TGC, CHL,                                                           |
| PA2013-LAV08 | Bone biopsy       | 30/11/2012    | 63          | 32                     | FOS, TET, MIN, TGC, CHL,                                                                     |
| PA2013-LAV09 | Lung              | 30/11/2012    | 62          | >32                    | TCC, FOS, TET, MIN, TGC, CHL, NET,                                                           |
| PA2013-LAV10 | Superficial pus   | 30/11/2012    | 74          | 32                     | TCC, FOS, TET, MIN, TGC, CHL,                                                                |
| PA2013-LAV11 | Superficial pus   | 03/12/2012    | 83          | 32                     | TIC, TCC, FOS, TET, MIN, TGC, CHL,                                                           |
| PA2013-LAV12 | Urine             | 02/12/2012    | 87          | 32                     | TIC, TCC, FOS, TET, MIN, TGC, CHL,                                                           |
| PA2013-LAV13 | Superficial pus   | 10/12/2012    | 80          | 32                     | FOS, TET, MIN, TGC, CHL, STR, CAR                                                            |
| PA2013-LAV14 | Urine             | 10/12/2012    | 85          | >32                    | GEN, TIC, TCC, TOB, CIP, LVX, OFX, TET, MIN, TGC, CHL, NET, CAR                              |
| PA2013-LAV15 | Bone biopsy       | 14/12/2012    | 92          | >32                    | FOS, TET, MIN, TGC, CHL,                                                                     |
| PA2013-LAV16 | Catheter          | 13/12/2012    | 40          | 32                     | FOS, TET, MIN, TGC, CHL,                                                                     |
| PA2013-LAV17 | Redon drain       | 15/12/2012    | 81          | 32                     | PIP, PIP/TZP, AZT, CAZ, TIC, TCC, FEP, FOS, TET, MIN, TGC, CHL, CAR                          |
| PA2013-LAV18 | Ear               | 14/12/2012    | 40          | >32                    | FOS, TET, MIN, TGC, CHL,                                                                     |
| PA2013-LAV19 | Stool sample      | 16/12/2012    | 66          | 32                     | PIP, PIP/TZP, CAZ, TIC, TCC, IPM, MEM, FOS, TET, MIN, TGC, CHL, CAR                          |
| PA2013-LAV20 | Genital           | 17/12/2012    | 62          | >32                    | GEN, IPM, FOS, TET, MIN, TGC, CHL, NET,                                                      |

TIC : ticarcillin, TCC : ticarcillin/clavulanic acid, FOS : fosfomicin, TET : tetracycline, MIN, minocycline, TCG, tigecycline, CAR : carbenicillin, PIP : piperacillin, PIP/TZP : piperacillin/tazobactam, GEN : gentamycin, CAZ : ceftazidime, FEP : cefepime, TOB : tobramycin, IPM : imipenem, CIP : ciprofloxacin, AMK : amikacin, LVX : levofloxacin, OFX : ofloxacin, NET : netilmicin, STR, streptomycin, MEM : meropenem.
