# Supplementary material for: Polyamino-Isoprenic Derivatives Block Intrinsic Resistance of P. aeruginosa to Doxycycline and Chloramphenicol In Vitro
Source: PubMed Central journal article supplement (PMC4859512; doi:10.1371/journal.pone.0154490), 2016-05-06
Supplement: pone.0154490.s005.pdf [file pone.0154490.s005.pdf]

| Doxycycline                     |                                                            | Concentration of compound 3 associated ( $\mu\text{M}$ ) | FIC index   | Effect      |
|---------------------------------|------------------------------------------------------------|----------------------------------------------------------|-------------|-------------|
| MIC ( $\mu\text{g}/\text{ml}$ ) | MIC associated with compound 3 ( $\mu\text{g}/\text{ml}$ ) |                                                          |             |             |
| 32                              | 16                                                         | 0.18                                                     | <b>0.50</b> | Synergistic |
|                                 | 8                                                          | 0.73                                                     | <b>0.26</b> | Synergistic |
|                                 | 4                                                          | 2.93                                                     | <b>0.16</b> | Synergistic |
|                                 | 2                                                          | 2.93                                                     | <b>0.09</b> | Synergistic |
|                                 | 1                                                          | 5.86                                                     | <b>0.09</b> | Synergistic |
|                                 | 0.5                                                        | 11.72                                                    | <b>0.14</b> | Synergistic |
|                                 | 0.25                                                       | 23.44                                                    | <b>0.26</b> | Synergistic |
|                                 | 0.125                                                      | 46.88                                                    | <b>0.50</b> | Synergistic |
|                                 | 0.0625                                                     | 93.75                                                    | <b>1</b>    | Additive    |

a)

| Doxycycline                     |                                                              | Concentration of PA $\beta$ N associated ( $\mu\text{M}$ ) | FIC index   | Effect      |
|---------------------------------|--------------------------------------------------------------|------------------------------------------------------------|-------------|-------------|
| MIC ( $\mu\text{g}/\text{ml}$ ) | MIC associated with PA $\beta$ N ( $\mu\text{g}/\text{ml}$ ) |                                                            |             |             |
| 32                              | 16                                                           | 2                                                          | <b>0.5</b>  | Synergistic |
|                                 | 8                                                            | 4                                                          | <b>0.25</b> | Synergistic |
|                                 | 4                                                            | 8                                                          | <b>0.13</b> | Synergistic |
|                                 | 2                                                            | 32                                                         | <b>0.09</b> | Synergistic |
|                                 | 1                                                            | 32                                                         | <b>0.06</b> | Synergistic |
|                                 | 0.5                                                          | 32                                                         | <b>0.05</b> | Synergistic |
|                                 | 0.25                                                         | 32                                                         | <b>0.04</b> | Synergistic |
|                                 | 0.125                                                        | 128                                                        | <b>0.13</b> | Synergistic |
|                                 | 0.0625                                                       | 256                                                        | <b>0.25</b> | Additive    |

b)
