# Supplementary material for: Polyamino-Isoprenic Derivatives Block Intrinsic Resistance of P. aeruginosa to Doxycycline and Chloramphenicol In Vitro
Source: PubMed Central journal article supplement (PMC4859512; doi:10.1371/journal.pone.0154490), 2016-05-06
Supplement: pone.0154490.s006.pdf [file pone.0154490.s006.pdf]

| Strains               | Compounds     | MIC (mg/L)  |             |               |          |
|-----------------------|---------------|-------------|-------------|---------------|----------|
|                       |               | Ceftazidime | Ticarcillin | Ciprofloxacin | Amikacin |
| PA01                  | ∅             | 2           | 32-64       | 0.125         | 8        |
|                       | <b>3</b> 10μM | 2           | 16          | 0.125         | 64       |
|                       | PAβN 10μM     | 2           | 32          | 0.125         | 16       |
|                       | PAβN 30μM     | 1           | 32          | ≤0.06         | 16       |
| PT629                 | ∅             | 8           | >64         | 0.5-1         | 4        |
|                       | <b>3</b> 10μM | 8           | 64          | 0.5           | 64       |
|                       | PAβN 10μM     | 8           | >64         | 0.5           | 4        |
|                       | PAβN 30μM     | 2-4         | >64         | 0.5           | 4-8      |
| PA01 ERY <sup>R</sup> | ∅             | 2           | 32-64       | 0.125         | 1        |
|                       | <b>3</b> 10μM | 2           | 16          | 0.125         | 32       |
|                       | PAβN 10μM     | 2           | 32          | 0.125         | 2        |
|                       | PAβN 30μM     | 2           | 32          | ≤0.06         | 2        |
| PA0-7H                | ∅             | 1           | 8           | 4             | 4        |
|                       | <b>3</b> 10μM | 1           | 4           | 1             | 64       |
|                       | PAβN 10μM     | 1           | 8           | 4             | 4        |
|                       | PAβN 30μM     | 1           | 8           | 4             | 4        |
| CMZ091                | ∅             | 2           | 16-32       | 0.5           | 32       |
|                       | <b>3</b> 10μM | 2           | 8           | 0.25          | >64      |
|                       | PAβN 10μM     | 2           | 16-32       | 0.5           | 64       |
|                       | PAβN 30μM     | 2           | 16-32       | 0.25          | 32-64    |
